# Supplementary material
Source: PubMed Central journal article supplement (PMC149984)

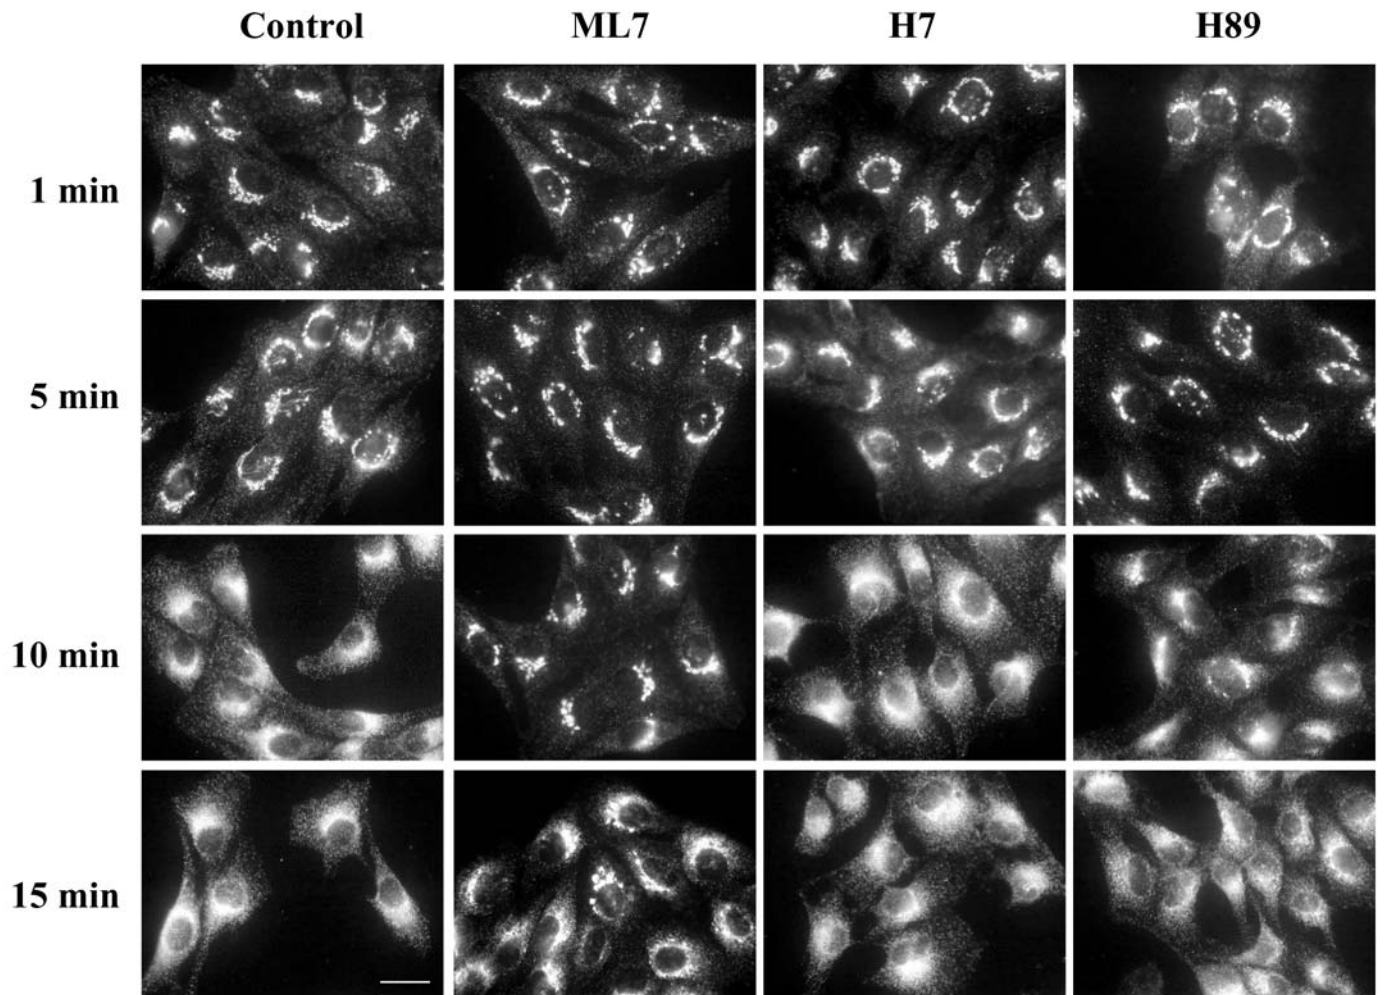

Supplement: mbc_14_2_445__1.pdf [file mbc_14_2_445__1.pdf]
